# Supplementary material for: Genome-wide expression profiling and phenotypic evaluation of European maize inbreds at seedling stage in response to heat stress
Source: PubMed Central journal article supplement (PMC4347969; doi:10.1186/s12864-015-1282-1), 2015-02-25

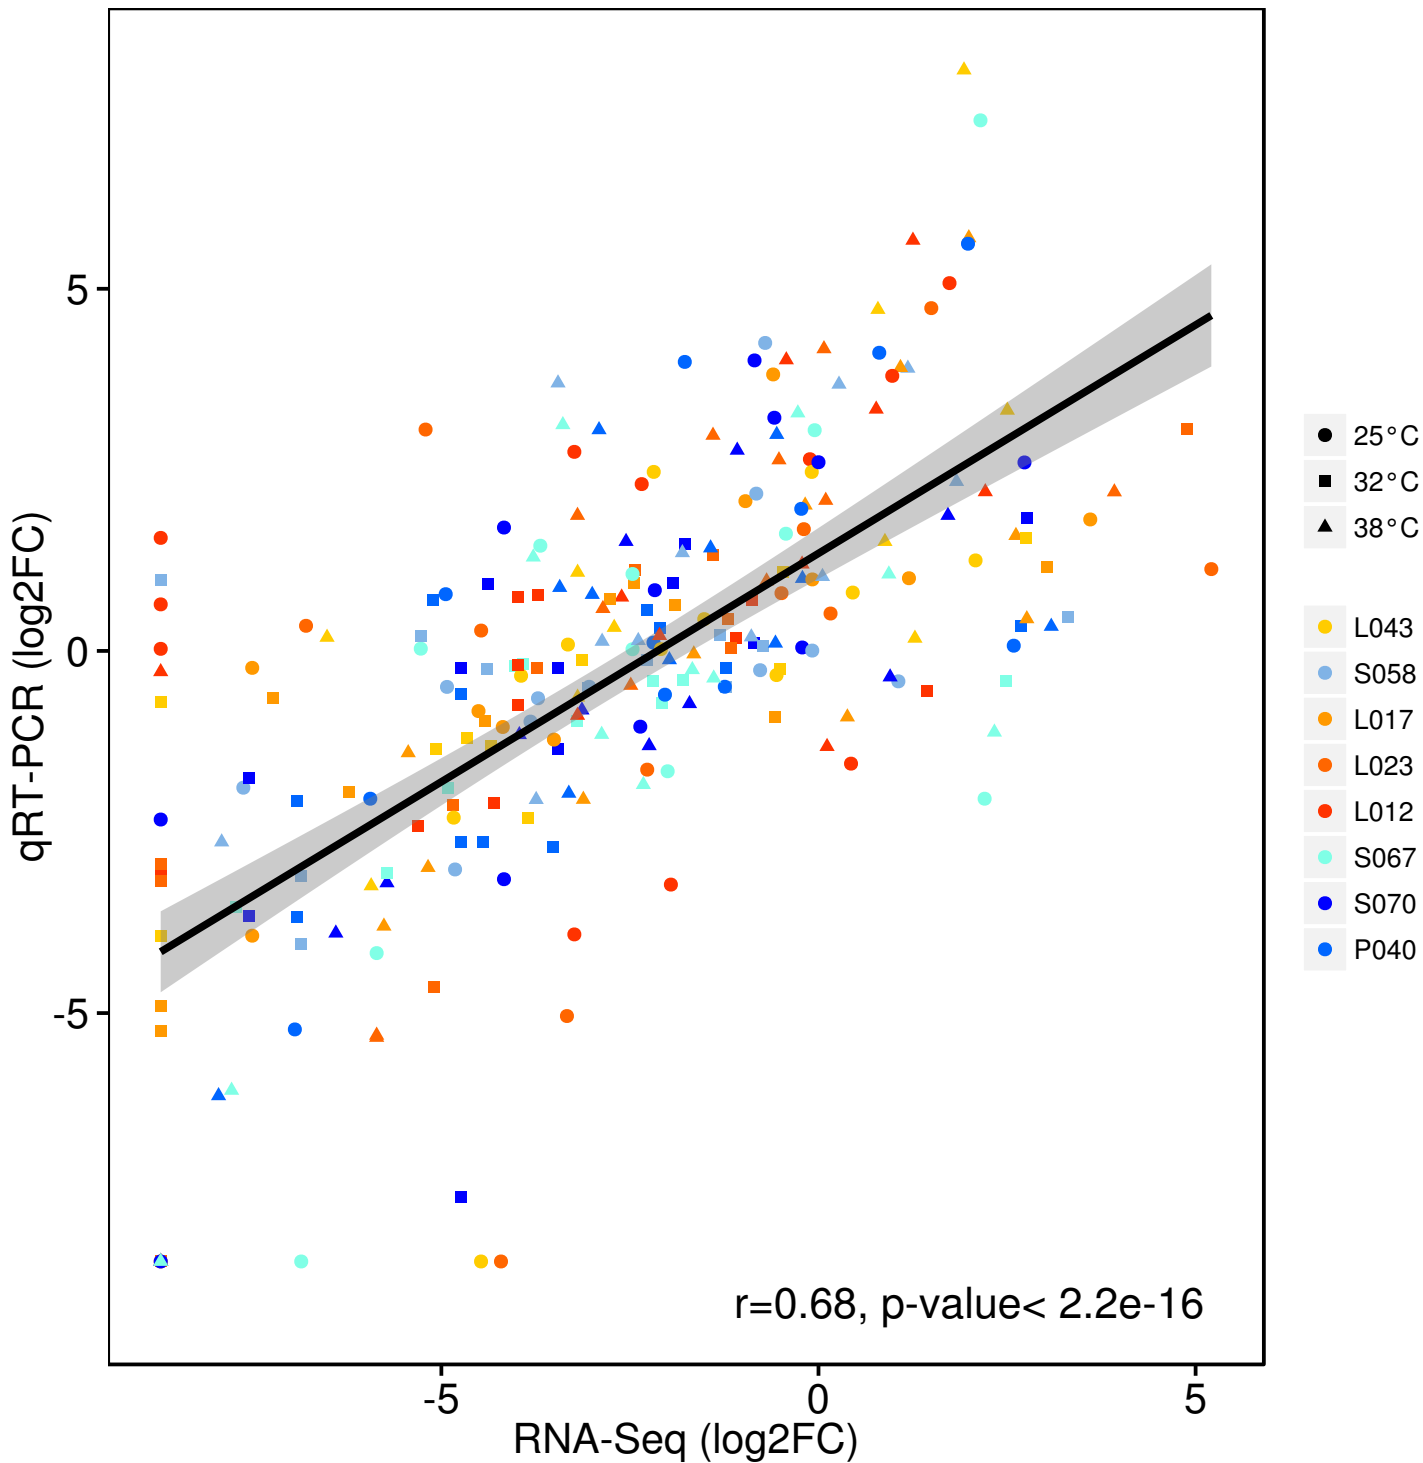

Supplement: 12864_2015_1282_MOESM5_ESM.pdf [file 12864_2015_1282_MOESM5_ESM.pdf]
